CORRECTION

# Correction: Effect of corruption on perceived difficulties in healthcare access in sub-Saharan Africa

Amber Hsiao, Verena Vogt, Wilm Quentin

The Funding statement is incorrect. The correct Funding statement is as follows: We acknowledge support by the German Research Foundation and the Open Access Publication Fund of TU Berlin.

## Reference

1. Hsiao A, Vogt V, Quentin W (2019) Effect of corruption on perceived difficulties in healthcare access in sub-Saharan Africa. PLoS ONE 14(8): e0220583. <https://doi.org/10.1371/journal.pone.0220583> PMID: 31433821

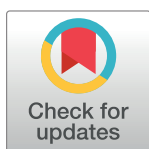

## OPEN ACCESS

**Citation:** Hsiao A, Vogt V, Quentin W (2019) Correction: Effect of corruption on perceived difficulties in healthcare access in sub-Saharan Africa. PLoS ONE 14(11): e0224915. <https://doi.org/10.1371/journal.pone.0224915>

**Published:** November 1, 2019

**Copyright:** © 2019 Hsiao et al. This is an open access article distributed under the terms of the [Creative Commons Attribution License](https://creativecommons.org/licenses/by/4.0/), which permits unrestricted use, distribution, and reproduction in any medium, provided the original author and source are credited.
